# Supplementary material for: Ab Initio Investigation of Per- and Poly-fluoroalkyl Substance (PFAS) Adsorption on Zerovalent Iron (Fe0)
Source: PubMed Central journal article supplement — ACS Omega. 2024 Oct 23;9(44):44532–41. doi: 10.1021/acsomega.4c06612 (PMC11541440; doi:10.1021/acsomega.4c06612), 2024-10-23
Supplement: ao4c06612_si_001.pdf [file ao4c06612_si_001.pdf]

**Supplementary Data**  
**for**  
***Ab-initio* Investigation of Per- and Poly-fluoroalkyl substances (PFAS) Adsorption on**  
**Zerovalent Iron (Fe<sup>0</sup>)**

Mohamed S. Mohamed<sup>1,2</sup>, Brian P. Chaplin<sup>3</sup>, and Ahmed A. Abokifa<sup>4,\*</sup>

<sup>1</sup>Ph.D. Candidate; Department of Civil, Materials, and Environmental Engineering; University of Illinois Chicago, 842 West Taylor Street, Chicago, IL 60607, USA.

<sup>2</sup>Assistant Lecturer, Faculty of Engineering, Cairo University, Giza, 12613, Egypt.

<sup>3</sup>Professor; Department of Chemical Engineering; University of Illinois Chicago, 842 West Taylor Street, Chicago, IL 60607, USA.

<sup>4</sup>Assistant Professor; Department of Civil, Materials, and Environmental Engineering; University of Illinois Chicago, 842 West Taylor Street, Chicago, IL 60607, USA.

July 2024

Submitted To:

ACS Omega

\* To whom correspondence should be addressed: Dr. Ahmed Abokifa; [abokifa@uic.edu](mailto:abokifa@uic.edu); +1-312-413-4636

The supplementary data provides 4 tables; the adsorption energies of PFBA and PFBS on Fe(111) and Fe(110), the adsorption energies of preadsorbed O on Fe(110), and the adsorption energies for preadsorbed Ni on Fe(110).

## Tables

**Table S1.** Adsorption energies for PFBA and PFBS over different sites on Fe (111)

| Molecule | Site    | Adsorption Energy (Eads.) (eV) |
|----------|---------|--------------------------------|
| PFBA     | Fcc     | -2.44                          |
|          | Hcp     | -0.77                          |
|          | Hollow  | <b>-2.50</b>                   |
|          | Top     | 0.05                           |
|          | Top-fcc | -1.17                          |
|          | Top-hcp | -0.71                          |
| PFBS     | Fcc     | -2.92                          |
|          | Hcp     | <b>-3.51</b>                   |
|          | Hollow  | -3.04                          |
|          | Top     | -2.86                          |
|          | Top-fcc | -3.39                          |
|          | Top-hcp | -3.46                          |

**Table S2.** Adsorption energies for PFBA and PFBS over different sites on Fe (110)

| Molecule | Site         | Adsorption Energy (Eads.) (eV) |
|----------|--------------|--------------------------------|
| PFBA     | 3-fold       | -0.45                          |
|          | Long Bridge  | <b>-2.23</b>                   |
|          | Short Bridge | -0.60                          |
|          | Top          | -0.43                          |
| PFBS     | 3-fold       | <b>-3.56</b>                   |
|          | Long Bridge  | -2.21                          |
|          | Short Bridge | -2.94                          |

|  |     |       |
|--|-----|-------|
|  | Top | -3.39 |
|--|-----|-------|

**Table S3.** Adsorption energies for a pre-adsorbed oxygen monolayer for different adsorption sites over Fe (110).

| Site         | Eads. (eV)   |
|--------------|--------------|
| 3-fold       | <b>-4.13</b> |
| Long Bridge  | -2.85        |
| Short Bridge | -2.79        |
| Top          | -1.63        |

**Table S4.** Adsorption energies for a pre-adsorbed Ni monolayer for different adsorption sites over Fe (110).

| Site         | Eads. (eV)   |
|--------------|--------------|
| 3-fold       | 0.30         |
| Long Bridge  | <b>-0.31</b> |
| Short Bridge | 0.07         |
| Top          | 0.75         |
